# Supplementary material for: Metabolomic Alteration in the Plasma of Wild Rodents Environmentally Exposed to Lead: A Preliminary Study
Source: MDPI journal article supplement (doi:10.3390/ijerph19010541), 2022-01-04
Supplement: s1 [file s1]

## **Supplemental Material**

### **Metabolomic alteration in the plasma of wild rodents environmentally exposed to lead: a preliminary study**

Hokuto Nakata, Akifumi Eguchi, Shouta M.M. Nakayama, John Yabe, Kaampwe Muzandu, Yoshinori Ikenaka, Chisato Mori, Mayumi Ishizuka

## **Table of Contents**

**Supplementary Figure S1. Map of Kabwe town showing a mine dump site and two sampling sites, including Mutwe Wansofu and Kang'omba (modified from Google Earth).**

**Supplementary Figure S2. Importance of the selected variables in the lasso logistic model.**

**Supplementary Table S1. Outcomes of enrichment analysis of altered metabolic pathways identified as potential biomarkers in the lasso logistic regression model and random forest model.**

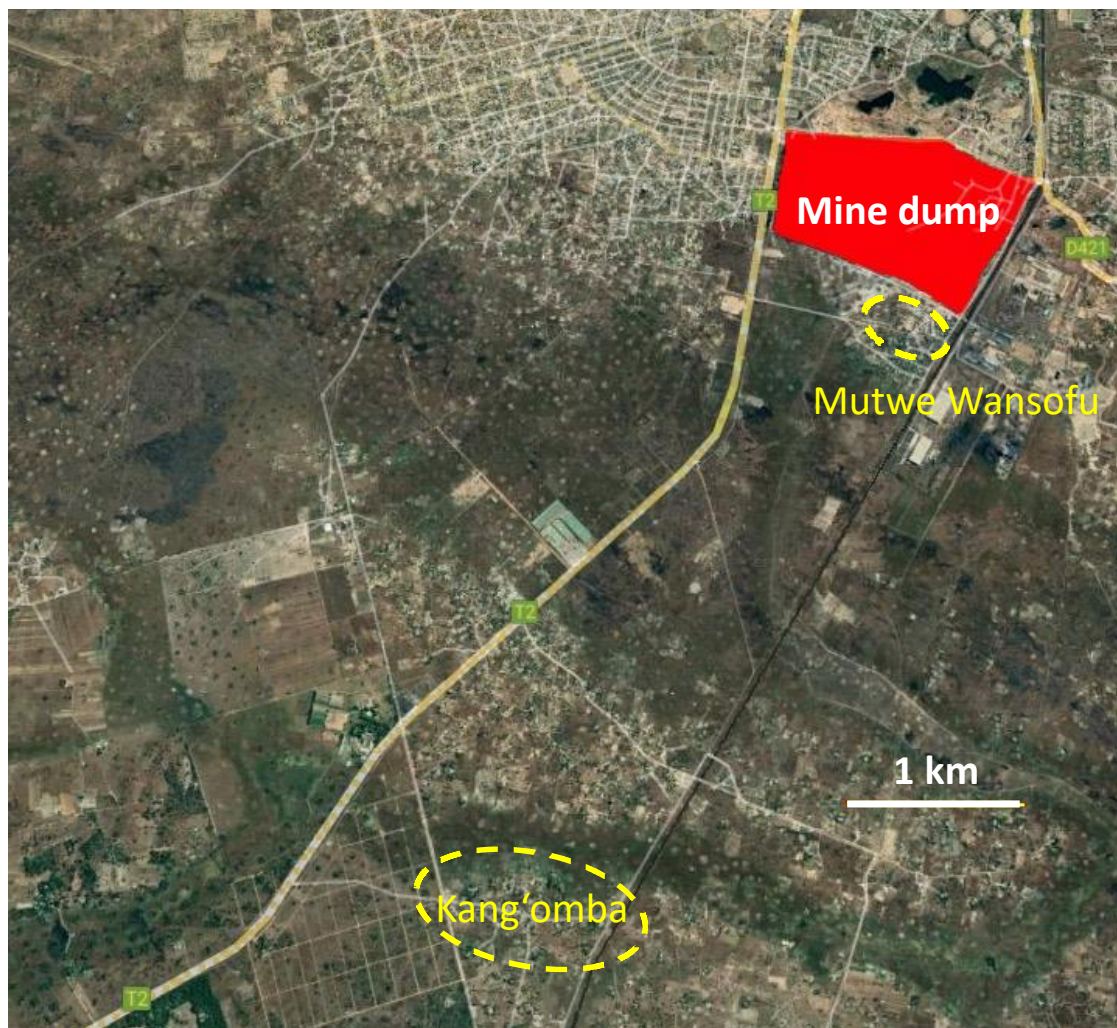

**Supplementary Figure S1. Map of Kabwe town showing a mine dump site and two sampling sites, including Mutwe Wansofu and Kang'omba (modified from Google Earth).**

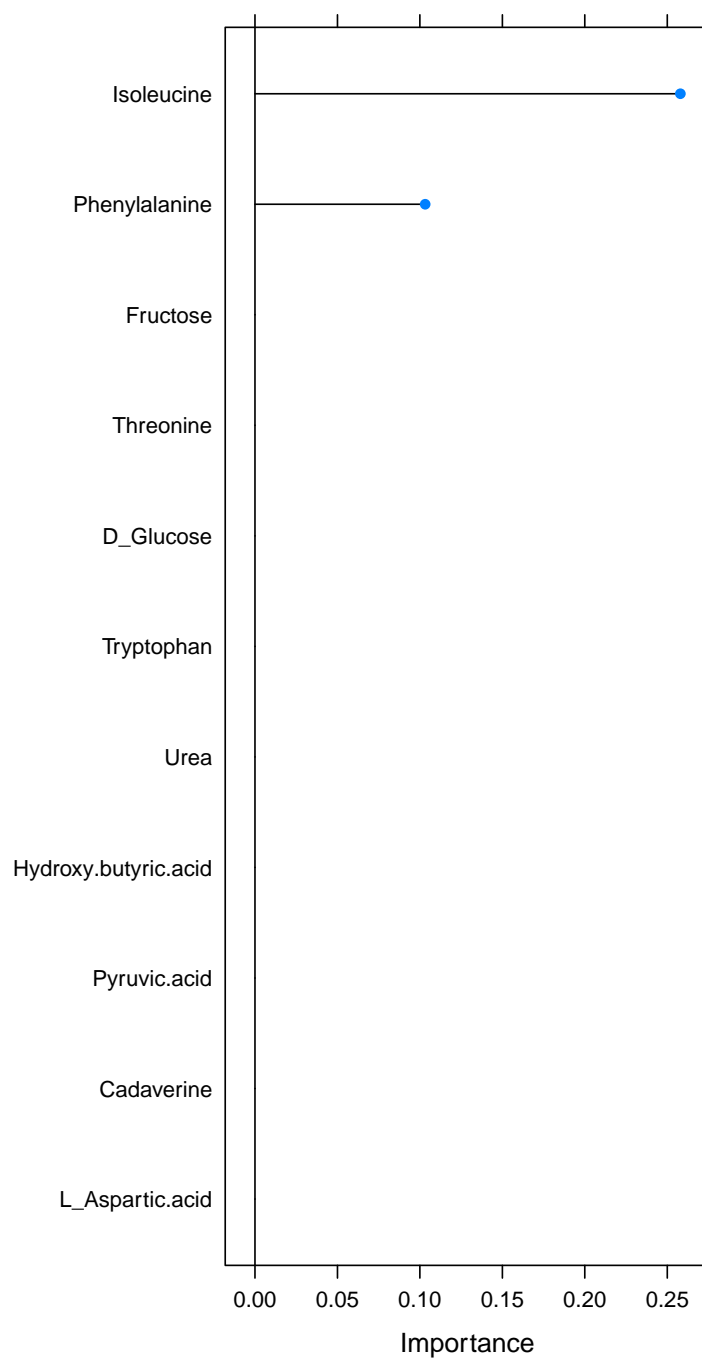

**Supplementary Figure S2. Importance of the selected variables in the lasso logistic model.**

Abbreviations: lasso, least absolute shrinkage and selection operator

**Supplementary Table S1.** Outcomes of enrichment analysis of altered metabolic pathways identified as potential biomarkers in the lasso logistic regression model and random forest model.

| For lasso logistic regression model |                                                                             |               |          |         |                |                                                 |                                  |
|-------------------------------------|-----------------------------------------------------------------------------|---------------|----------|---------|----------------|-------------------------------------------------|----------------------------------|
| ID Annotation                       | Annotation                                                                  | Category      | Database | p-value | FDR correction | Submitted IDs                                   | Matching IDs                     |
| SMP00059                            | Urea Cycle                                                                  | SMPDB Pathway | ECMDB    | 0.0043  | 0.0658         | ChEBI:17295 ChEBI:18050                         | ECMDB00159 ECMDB00641            |
| SMP00019                            | Transcription/Translation                                                   | SMPDB Pathway | HMDB     | 0.0097  | 0.0876         | ChEBI:17295 ChEBI:18050                         | HMDB00159 HMDB00641              |
| COMPLETE-ARO-PWY-1                  | superpathway of phenylalanine, tyrosine, and tryptophan biosynthesis        | Pathways      | BioCyc   | 0.0033  | 0.1289         | ChEBI:18050 ChEBI:17295                         | GLN PHE                          |
| PWY-6318                            | phenylalanine degradation IV                                                | Pathways      | BioCyc   | 0.0089  | 0.1289         | ChEBI:18050 ChEBI:17295                         | GLN PHE                          |
| TRNA-CHARGING-PWY                   | tRNA charging                                                               | Pathways      | BioCyc   | 0.0422  | 0.1289         | ChEBI:18050 ChEBI:17295                         | GLN PHE                          |
| PWY-6219                            | indole-3-acetyl-amide conjugate biosynthesis                                | Pathways      | BioCyc   | 0.0041  | 0.1289         | ChEBI:18050 ChEBI:17295                         | GLN PHE                          |
| PWY-1782                            | superpathway of indole-3-acetate conjugate biosynthesis                     | Pathways      | BioCyc   | 0.0055  | 0.1289         | ChEBI:18050 ChEBI:17295                         | GLN PHE                          |
| map00970                            | Aminoacyl-tRNA biosynthesis                                                 | Pathways      | KEGG     | 0.0163  | 0.1930         | ChEBI:18050 ChEBI:17295                         | C00064 C00079                    |
| map02010                            | ABC transporters                                                            | Pathways      | KEGG     | 0.0230  | 0.1930         | ChEBI:18050 ChEBI:17295                         | C00064 C00079                    |
| SMP00059                            | Urea Cycle                                                                  | SMPDB Pathway | ECMDB    | 0.0617  | 0.2702         | ChEBI:17295 ChEBI:18050                         | ECMDB00159 ECMDB00641            |
| SMP00059                            | Urea Cycle                                                                  | SMPDB Pathway | ECMDB    | 0.9329  | 0.9329         | ChEBI:17295 ChEBI:18050                         | ECMDB00159 ECMDB00641            |
| map01100                            | Metabolic pathways                                                          | Pathways      | KEGG     | 0.9138  | 0.9448         | ChEBI:18050 ChEBI:17295                         | C00064 C00079                    |
| For random forest model             |                                                                             |               |          |         |                |                                                 |                                  |
| ID Annotation                       | Annotation                                                                  | Category      | Database | p-value | FDR correction | Submitted IDs                                   | Matching IDs                     |
| map01100                            | Metabolic pathways                                                          | Pathways      | KEGG     | 0.8758  | 0.9094         | ChEBI:18050 ChEBI:17295 ChEBI:17191 ChEBI:17066 | C00064 C00079 C00407 C01089      |
| SMP00059                            | Urea Cycle                                                                  | SMPDB Pathway | ECMDB    | 0.0003  | 0.0050         | ChEBI:17295 ChEBI:17191 ChEBI:18050             | ECMDB00159 ECMDB00172 ECMDB00641 |
| SMP00019                            | Transcription/Translation                                                   | SMPDB Pathway | HMDB     | 0.0009  | 0.0096         | ChEBI:17295 ChEBI:17191 ChEBI:18050             | HMDB00159 HMDB00172 HMDB00641    |
| map00970                            | Aminoacyl-tRNA biosynthesis                                                 | Pathways      | KEGG     | 0.0036  | 0.0820         | ChEBI:18050 ChEBI:17295 ChEBI:17191             | C00064 C00079 C00407             |
| map02010                            | ABC transporters                                                            | Pathways      | KEGG     | 0.0061  | 0.0820         | ChEBI:18050 ChEBI:17295 ChEBI:17191             | C00064 C00079 C00407             |
| SMP00059                            | Urea Cycle                                                                  | SMPDB Pathway | ECMDB    | 0.0163  | 0.1383         | ChEBI:17295 ChEBI:17191 ChEBI:18050             | ECMDB00159 ECMDB00172 ECMDB00641 |
| TRNA-CHARGING-PWY                   | tRNA charging                                                               | Pathways      | BioCyc   | 0.0062  | 0.1463         | ChEBI:18050 ChEBI:17191 ChEBI:17295             | GLN ILE PHE                      |
| SMP00059                            | Urea Cycle                                                                  | SMPDB Pathway | ECMDB    | 0.9265  | 0.9265         | ChEBI:17295 ChEBI:17191 ChEBI:18050             | ECMDB00159 ECMDB00172 ECMDB00641 |
| PWY-6220                            | jasmonoyl-amino acid conjugates biosynthesis I                              | Pathways      | BioCyc   | 0.0029  | 0.1463         | ChEBI:17191 ChEBI:17295                         | ILE PHE                          |
| COMPLETE-ARO-PWY-1                  | superpathway of phenylalanine, tyrosine, and tryptophan biosynthesis        | Pathways      | BioCyc   | 0.0043  | 0.1463         | ChEBI:18050 ChEBI:17295                         | GLN PHE                          |
| PWY-6318                            | phenylalanine degradation IV                                                | Pathways      | BioCyc   | 0.0115  | 0.1463         | ChEBI:18050 ChEBI:17295                         | GLN PHE                          |
| PWY-1782                            | superpathway of indole-3-acetate conjugate biosynthesis                     | Pathways      | BioCyc   | 0.0072  | 0.1463         | ChEBI:18050 ChEBI:17295                         | GLN PHE                          |
| PWY-6219                            | indole-3-acetyl-amide conjugate biosynthesis                                | Pathways      | BioCyc   | 0.0054  | 0.1463         | ChEBI:18050 ChEBI:17295                         | GLN PHE                          |
| PWY-6233                            | jasmonoyl-amino acid conjugates biosynthesis II                             | Pathways      | BioCyc   | 0.0021  | 0.1463         | ChEBI:18050 ChEBI:17191                         | GLN ILE                          |
| map01064                            | Biosynthesis of alkaloids derived from ornithine, lysine and nicotinic acid | Pathways      | KEGG     | 0.0314  | 0.1696         | ChEBI:17295 ChEBI:17191                         | C00079 C00407                    |
| map00966                            | Glucosinolate biosynthesis                                                  | Pathways      | KEGG     | 0.0377  | 0.1696         | ChEBI:17295 ChEBI:17191                         | C00079 C00407                    |
| map00960                            | Tropane, piperidine and pyridine alkaloid biosynthesis                      | Pathways      | KEGG     | 0.0323  | 0.1696         | ChEBI:17295 ChEBI:17191                         | C00079 C00407                    |
| SMP00059                            | Urea Cycle                                                                  | SMPDB Pathway | ECMDB    | 0.6315  | 0.7157         | ChEBI:17295 ChEBI:17191                         | ECMDB00159 ECMDB00172            |
| map01110                            | Biosynthesis of secondary metabolites                                       | Pathways      | KEGG     | 0.9402  | 0.9402         | ChEBI:17295 ChEBI:17191                         | C00079 C00407                    |
